# Supplementary material for: An investigation of the global uptake of CO 2 by lime from 1930 to 2020
Source: Copernicus journal article supplement (doi:10.5194/essd-15-2431-2023), 2023-06-09
Supplement: Supplementary file 1 [file essd-15-2431-2023-supplement.zip]

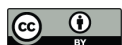

## *Supplement of*

# **An investigation of the global uptake of CO<sub>2</sub> by lime from 1930 to 2020**

**Longfei Bing et al.**

*Correspondence to:* Fengming Xi (xifengming@iae.ac.cn)

- [essd-15-2431-2023-supplement-title-page.pdf](#)
- [zenodo1930-2020](#)
  - SI-2 Lime material production and uses, 1930-2020.xlsx
  - SI-3 Uncertainty of lime carbon emission and uptake, 1930-2020.xlsx

The copyright of individual parts of the supplement might differ from the article licence.
